# Supplementary material
Source: PubMed Central journal article supplement (PMC140424)

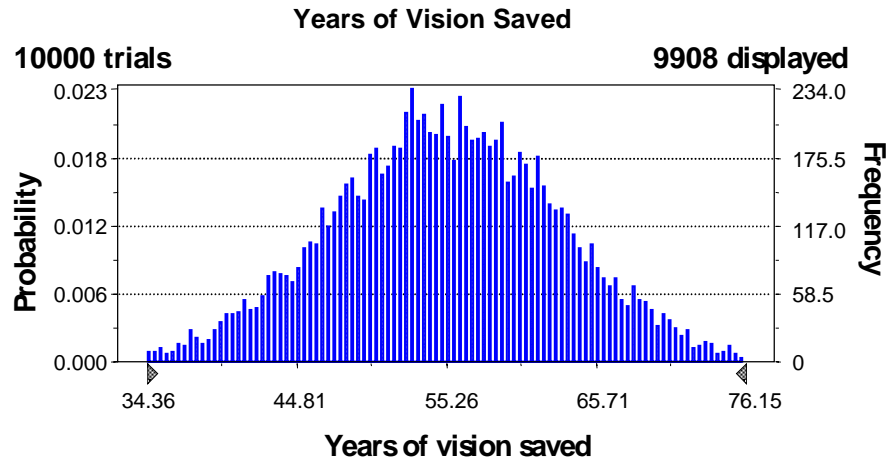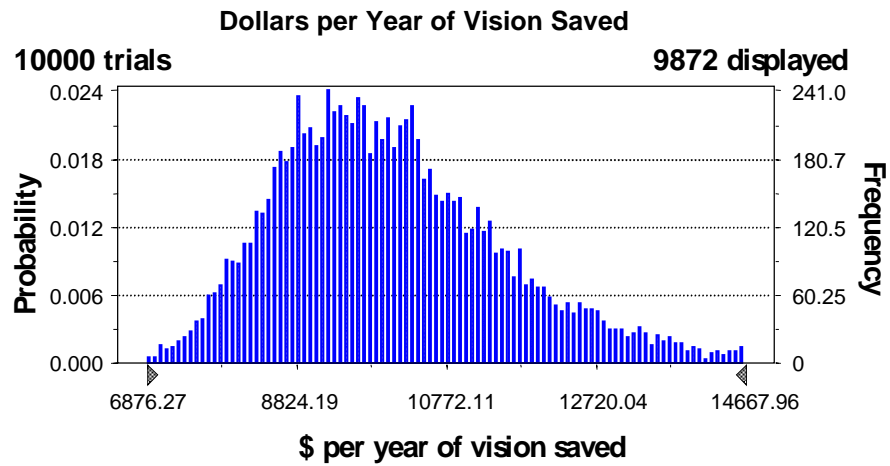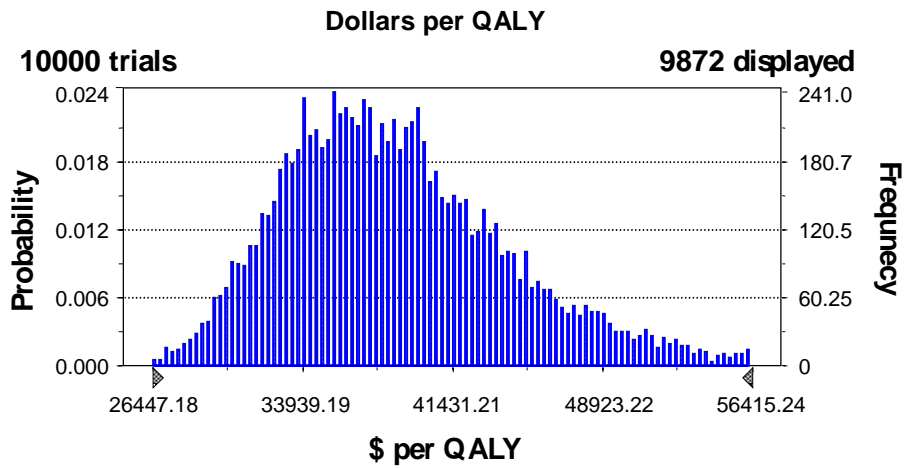

Supplement: cmaj_168_2_160__1.pdf [file cmaj_168_2_160__1.pdf]

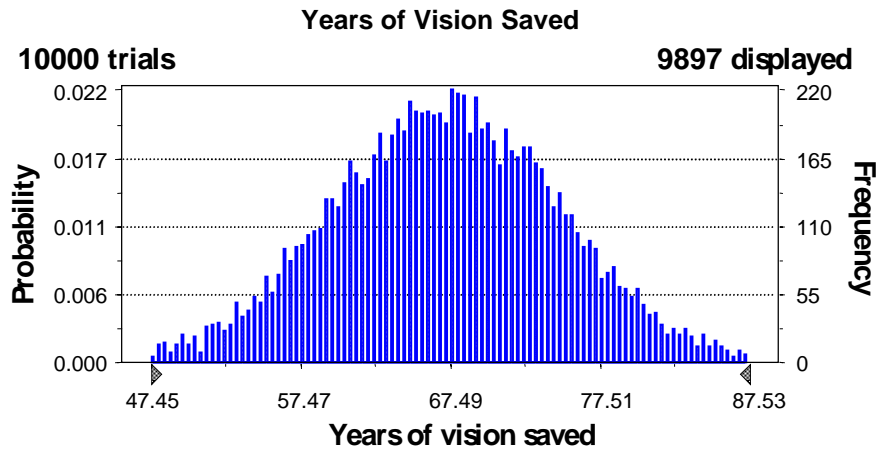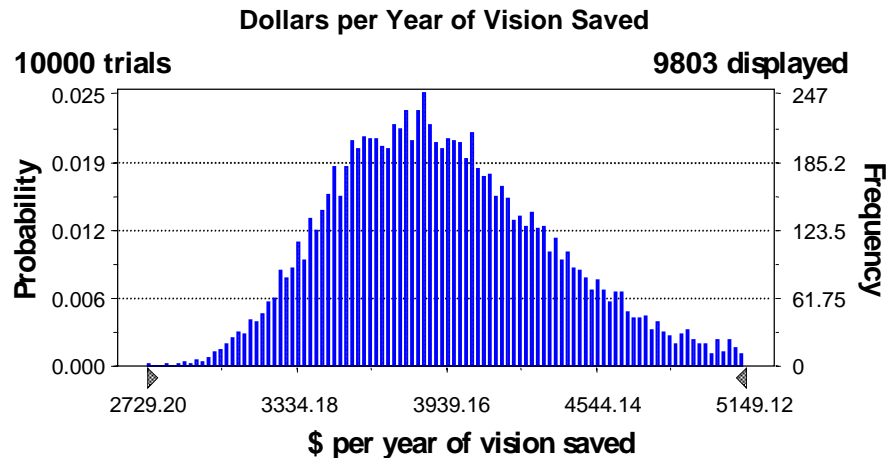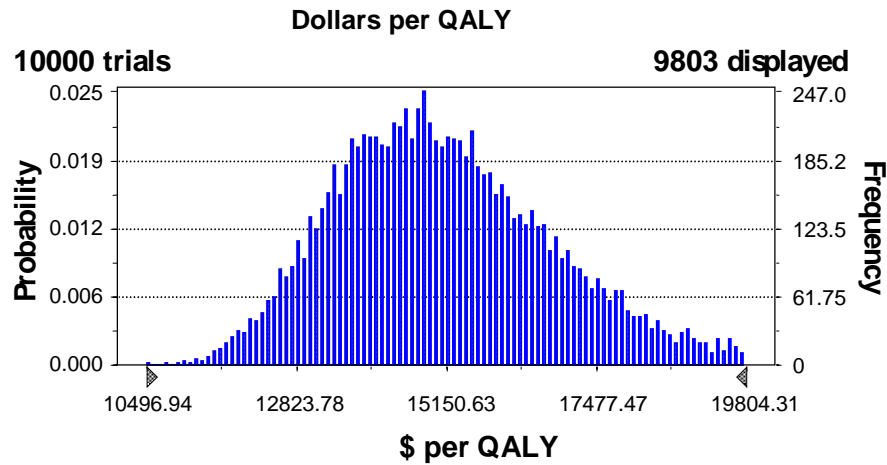

Supplement: cmaj_168_2_160__2.pdf [file cmaj_168_2_160__2.pdf]
